# Supplementary material for: Transcription Factors in the Fungus Aspergillus nidulans: Markers of Genetic Innovation, Network Rewiring and Conflict between Genomics and Transcriptomics
Source: MDPI journal article supplement (doi:10.3390/jof7080600), 2021-07-25
Supplement: s1 [file s1]

**Table S1: Oligonucleotides used in this study.**

| Name             | Sequence (5'-3')                                               |
|------------------|----------------------------------------------------------------|
| BrlA-PP1         | CAGCCGGGTACTGGAAGCACC                                          |
| BrlA-GSP2        | TTCATCCCAGCCGTCCAGGC                                           |
| BrlA-GFP1        | GCCTGGACGGCTGGGATGAAGGAGCTGGTGCAGGCGCTGGAGCC                   |
| BrlAGFP2         | AGATCAGCCCTCTTTGTTTCTGTTTCAGTCTGAGAGGAGGCACTGATGCG             |
| BrlA-GSP3        | TGAAACAGAAACAAAGAGGGCTGATCT                                    |
| BrlA-GSP4        | CCGCTTCCTACCCCGAATGG                                           |
| BrlA-ZnFDw       | CTGCACCTGCTTGATGACCTGTGG                                       |
| MsnAZnFforBrlAUp | CGATTGCGACCACCCCGTTTGCTGTGAGTCCTGGCGTGCTGGGCAAGG               |
| MsnAZnFforBrlADw | CCACAGGTCATCAAGCAGGTGCAGACATTCGTCTGCAATCTTTGCTCCCGC            |
| BrlA-ZnFUp       | AGCAAACGGGGTGGTCGCAATCG                                        |
| BrlAp2Dw         | GAGGAAGTGGTAAACTGGCGGATGG                                      |
| BrlA $\pm$ (+1)  | GAAGATCTCGCCGCTCCTCCTCC                                        |
| An10192-PP1      | CGACCAAAGAAGCCGCGATCACAGG                                      |
| An10192-PP2      | CATTGGCGTTGTCTGATTCAAGTGTGTCTTCG                               |
| An10192-GSP3     | TAACTCTTATTGATGCGCCTAGCTGTGTTCTTTGAGC                          |
| An10192-GSP4     | CGAAGGACTCTACGTAGACCTCGTGGGC                                   |
| An10192-SMP1     | CGAAGACACACTTGAATCAGACAACGCCAATGACCGGTCGCCTCAAACAATGCTCT       |
| An10192-GFP2     | GCTCAAAGAACACAGCTAGGCGCATCAATAAGAGTTAGTCTGAGAGGAGGCACTGATGCG   |
| An10192-sPP1     | CCACTGCCCTGGTTCCAAGAAAGC                                       |
| An10192-sGSP4    | GGCCGCTAACACTACCCAATATCACACGC                                  |
| An1500-PP1       | CGTTTCGTATTGGAGGTATGGCAAGCG                                    |
| An1500-PP2       | CATCATTTTGACGGTGTGGATCGC                                       |
| An1500-GSP3      | GATGGCTTGATTGCGAGCTGGAATTGG                                    |
| An1500-GSP4      | GCATCTGCAATGACATGTCCCTCACC                                     |
| An1500-SMP1      | GCGATCCAACACCGTCAAAATGATGACCGGTCGCCTCAAACAATGCTCT              |
| An1500-GFP2      | CCAATTCCAGCTCGCAAATCAAGCCATCGTCTGAGAGGAGGCACTGATGCG            |
| An1500-sPP1      | GTCAAAGCACAATTGGTGATGGCAGC                                     |
| An1500-sGSP4     | CAGCGTGATAAAGGAGGCAATTCGAAGC                                   |
| An2001-PP1       | GAAGCTAGTAGTGCAGCGTCAGCCACC                                    |
| An2001-PP2       | CATGGTCACTGTAGCCTATATCCAGAGATAAAGACAAC                         |
| An2001-GSP3      | GCGAACTAGAACGACTGAATCTAAGCACATATATATGCG                        |
| An2001-GSP4      | GGATCTTTTGCGGCAGGCACC                                          |
| An2001-SMP1      | GTTGTCTTTATCTCTGGATATAGGCTACAGTGACCATGACCGGTCGCCTCAAACAATGCTCT |
| An2001-GFP2      | GCCATATATATGTGCTTAGATTCACTCGTTCTAGTTCGCGTCTGAGAGGAGGCACTGATGCG |
| An2001-sPP1      | CTGCGGAAAGGGCACTTACTTGCG                                       |
| An2001-sGSP4     | GGAGGCGAAGCAACTTAGTCAGTCGG                                     |
| An4324-PP1       | CTCGCCGCAATTGAGAGTCACCG                                        |
| An4324-PP2       | CATTGTGGACGGTGGTAAATATGTACGAGAAG                               |
| An4324-GSP3      | TAACGCATTCTCTCTTTCTTCTCGCCAGATGC                               |
| An4324-GSP4      | CGAATCCGAATCCGTCTCCGAACCG                                      |
| An4324-SMP1      | CTTCTCGTACATATTTACCACCGTCCACAATGACCGGTCGCCTCAAACAATGCTCT       |
| An4324-GFP2      | GCATCTGGCGAGAAGAAAGAGAGAATGCGTTAGTCTGAGAGGAGGCACTGATGCG        |
| An4324-sPP1      | GATGCGCGAGGTCAATTCGGGACG                                       |
| An4324-sGSP4     | CATCCGTATAAGGCAAGCTGCGTCACG                                    |
| An4527-PP1       | CATTGACTGCTTGAAGGGAGATGTGACC                                   |
| An4527-PP2       | CATATTGGTCAATGTGCAAGCTTTCCAATCAG                               |
| An4527-GSP3      | TAGATATCGAACGGCTGTGACGACGTAACG                                 |
| An4527-GSP4      | CCCACAGCCACAGATAGACTTCCATTCCG                                  |
| An4527-SMP1      | CGTGATTGGAAAGCTTGACATTGACCAATATGACCGGTCGCCTCAAACAATGCTCT       |
| An4527-GFP2      | CGTTACGTCGTCACAGCCGTTTCGATATCTAGTCTGAGAGGAGGCACTGATGCG         |
| An4527-sPP1      | GTGAGCTTACCAAGTGCCCCGACCTGC                                    |
| An4527-sGSP4     | CTGATGACGATAATCTGGGGTAGGAAGGC                                  |
